# Supplementary material for: Metal-Coordinated Dynamics and Viscoelastic Properties of Double-Network Hydrogels
Source: MDPI journal article supplement (doi:10.3390/gels9020145), 2023-02-09
Supplement: s1 [file s1]

Supporting Information for

# Metal-Coordinated Dynamics and Viscoelastic Properties of Double-Network Hydrogels

Shilei Zhu <sup>1,†</sup>, Yan Wang <sup>2,†</sup>, Zhe Wang <sup>2</sup>, Lin Chen <sup>2</sup>, Fengbo Zhu <sup>2,3</sup>, Yanan Ye <sup>2,3,\*</sup>,  
Yong Zheng <sup>4,\*</sup>, Wenwen Yu <sup>2,3</sup> and Qiang Zheng <sup>2,5</sup>

<sup>1</sup> College of Physics, Taiyuan University of Technology, Taiyuan 030024, China

<sup>2</sup> College of Materials Science & Engineering, Taiyuan University of Technology, Taiyuan 030024, China

<sup>3</sup> Shanxi-Zheda Institute of Advanced Materials and Chemical Engineering, Taiyuan 030024, China

<sup>4</sup> Institute for Chemical Reaction Design and Discovery, Hokkaido University, Sapporo 001-0021, Japan

<sup>5</sup> Ministry of Education Key Laboratory of Macromolecular Synthesis and Functionalization, Department of Polymer Science and Engineering, Zhejiang University, Hangzhou 310027, China

\* Correspondence: yeyanan@tyut.edu.cn (Y.Y.), zhengyong@sci.hokudai.ac.jp (Y.Z.)

† These authors contributed equally to this work.

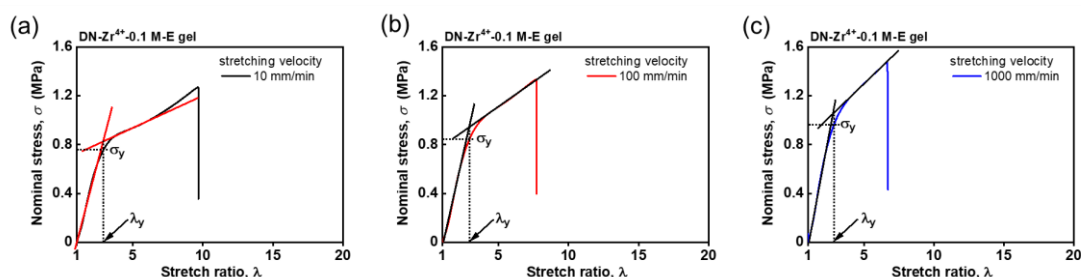

**Figure S1.** Determination of the yielding stretch ratio  $\lambda_y$  and the yielding stress  $\sigma_y$  for the DN-Zr<sup>4+</sup>-0.1 M-E hydrogels without obvious yielding.
